# Supplementary material for: Effect of Gelatin Coating and GO Incorporation on the Properties and Degradability of Electrospun PCL Scaffolds for Bone Tissue Regeneration
Source: MDPI journal article supplement (doi:10.3390/polym16010129), 2023-12-30
Supplement: s1 [file s1]

## Supplementary Material

### Effect of gelatin coating and GO incorporation on the properties and degradability of electrospun PCL scaffolds for bone tissue regeneration

Carlos Loyo <sup>1,2</sup>, Alexander Cordoba <sup>1</sup>, Humberto Palza <sup>3</sup>, Daniel Canales <sup>4</sup>, Francisco Melo <sup>5</sup>, Juan F. Vivanco <sup>6</sup>, Raúl Vallejos Baier <sup>7</sup>, Carola Millán <sup>7</sup>, Teresa Corrales <sup>8</sup>, Paula A. Zapata <sup>1\*</sup>

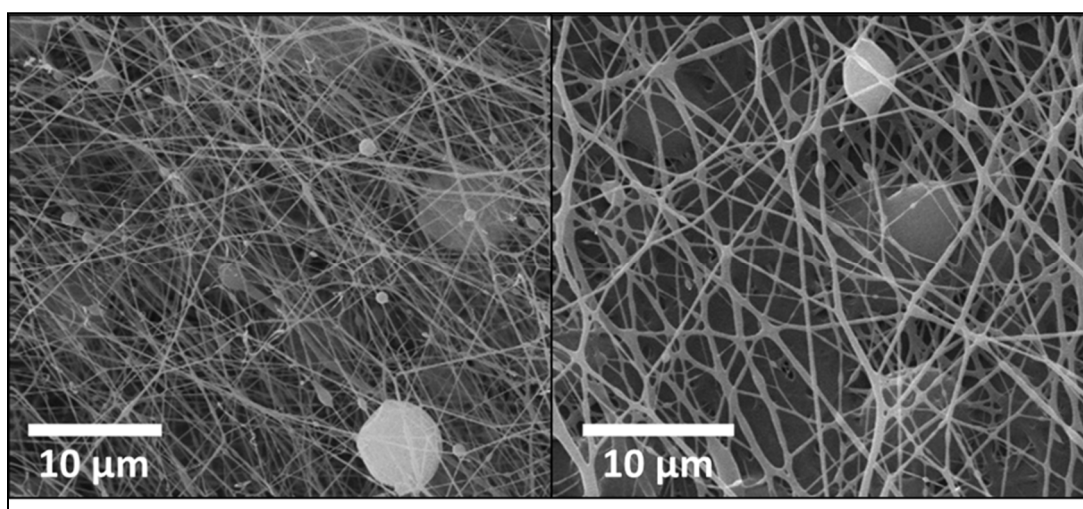

**Figure S1.** Image of SEM of PCL fibers obtained using only chloroform as a solvent.

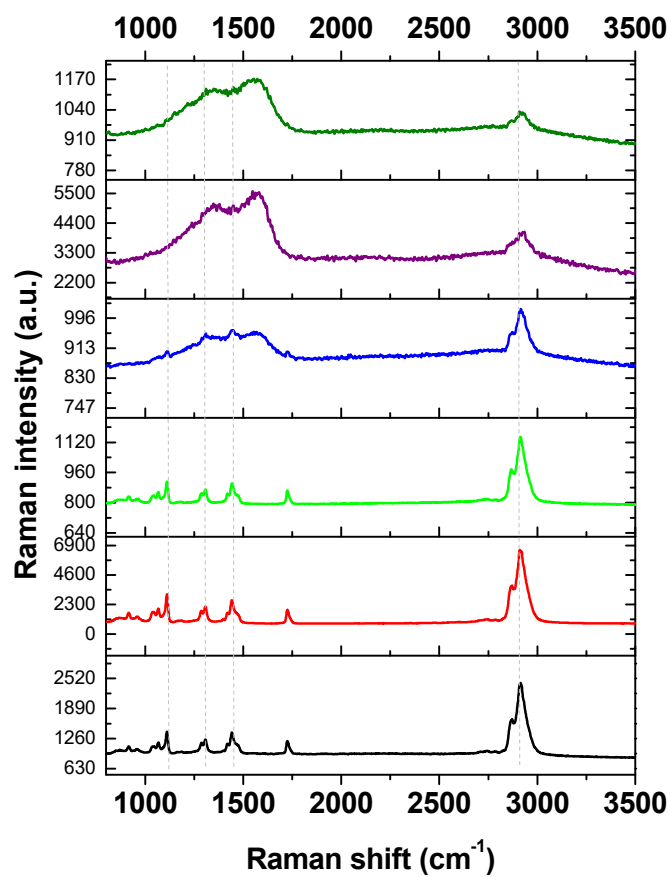

**Figure S2.** Raman intensity vs Raman shift for: PCL, PCL/1 wt%GO, PCL/2 wt%GO, Scaffold with SHINs: PCL/2 wt%GO intermediate spectrum, PCL/1 wt%GO, and PCL/2 wt%GO. (From bottom to top).

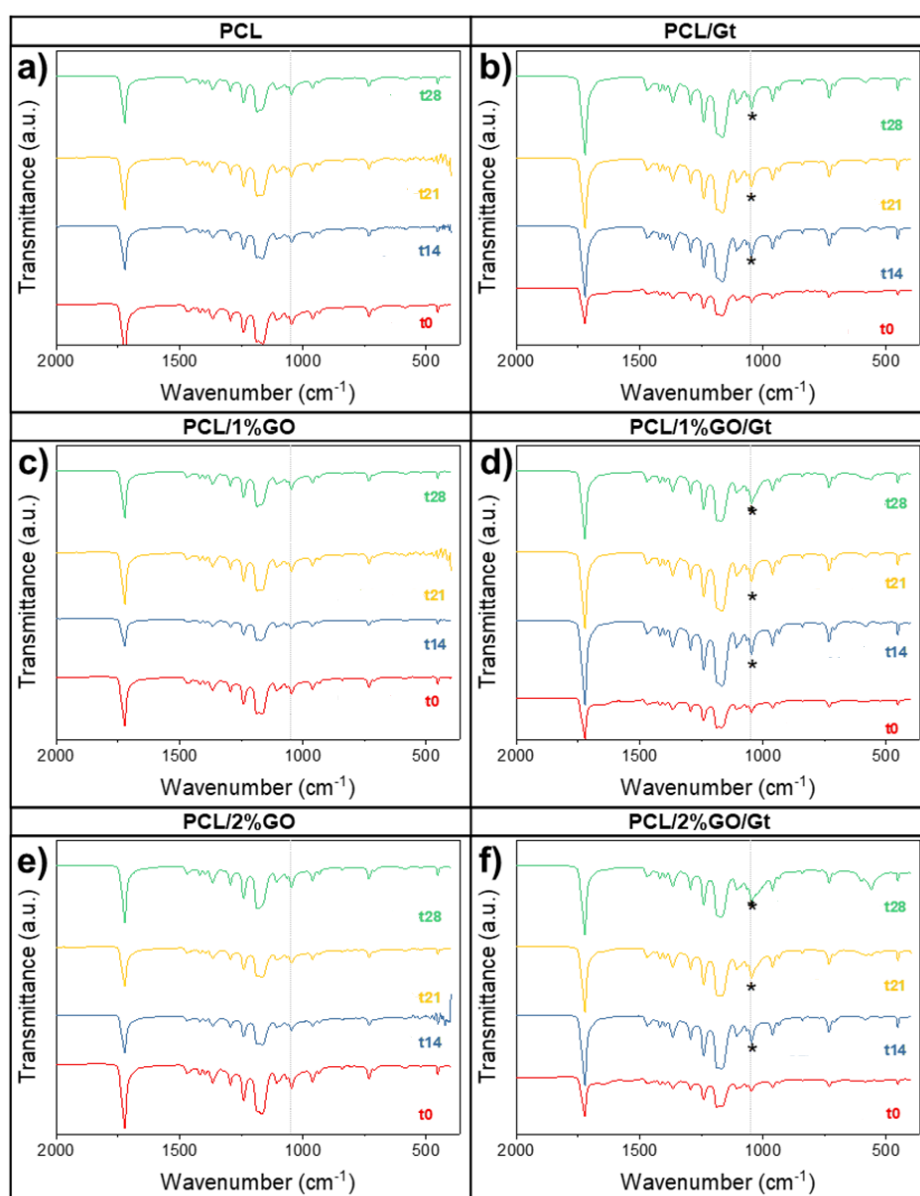

**Figure S3.** ATR-FTIR after 0, 14, 21, and 28 days of bioactivity assay for PCL, PCL/1 wt%GO, and PCL/2 wt %GO scaffolds, and gelatin-coated scaffolds: PCL/Gt; PCL/1 wt %GO/Gt, and PCL/2 wt%GO/Gt.

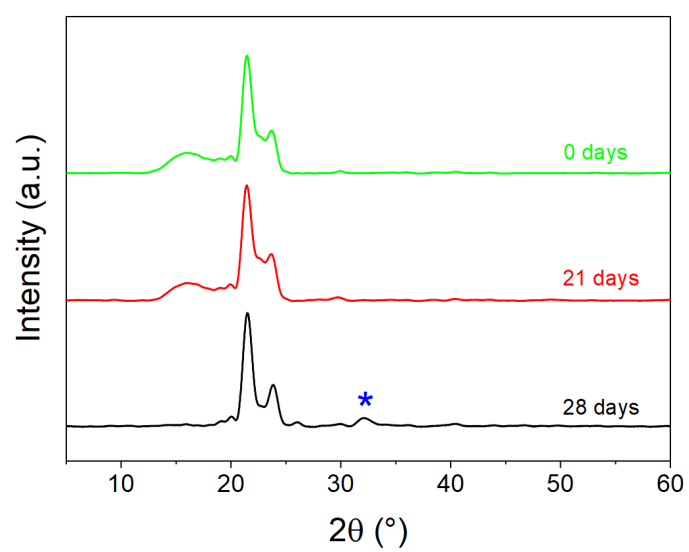

**Figure S4.** XRD after 0, 21, and 28 days of bioactivity assay for PCL/2 wt% GO/Gt.
